# Supplementary material for: Design of electron-donating group substituted 2-PAM analogs as antidotes for organophosphate insecticide poisoning
Source: Royal Society of Chemistry journal article supplement (doi:10.1039/d3ra03087c), 2023-01-01
Supplement: d3ra03087c1.pdf [file d3ra03087c1.pdf]

## Supplementary Information

**Table S1** The electron-donating groups (EDGs) were used to substitution at the pyridinium ring of 2-PAM

| Groups                            | Name | Structure                                                                            |
|-----------------------------------|------|--------------------------------------------------------------------------------------|
| <b>Weakly donating groups</b>     | 1    |    |
|                                   | 2    |    |
|                                   | 3    |    |
| <b>Moderately donating groups</b> | 4    |    |
|                                   | 5    |   |
| <b>Strongly donating groups</b>   | 6    |  |
|                                   | 7    |  |
|                                   | 8    |  |
|                                   | 9    |  |

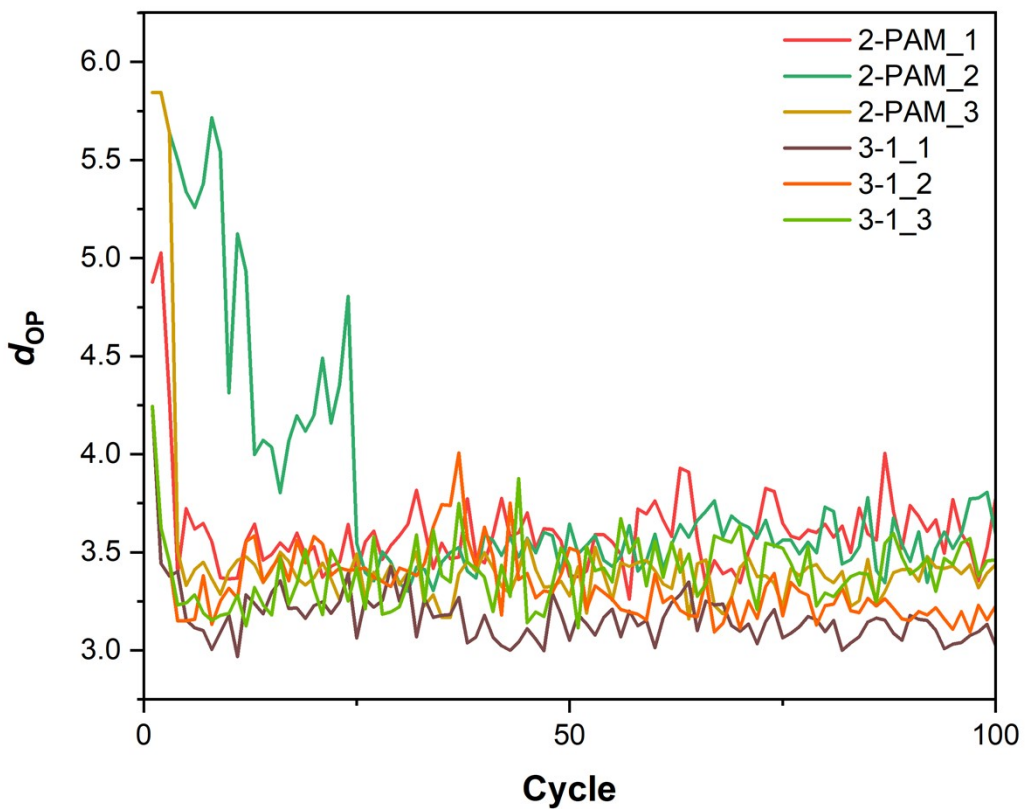

**Figure S1** The  $d_{OP}$  plot of 2-PAM and 3-1 obtained from three independent DS-MD simulations

**Table S2** Drug-likeness analysis for 2-PAM and designed analogs

| Compound | M.W.   | # HBA | # HBD | # R.B. | #heavy atom | PSA   | cLogP | LLE  | LELP  | BBB |
|----------|--------|-------|-------|--------|-------------|-------|-------|------|-------|-----|
| 2-PAM    | 137.16 | 2     | 1     | 1      | 6           | 36.47 | -2.66 | 9.52 | -2.82 | No  |
| 0-1      | 151.19 | 2     | 1     | 1      | 11          | 36.47 | -2.26 | 9.08 | -2.65 | Yes |
| 0-2      | 191.25 | 2     | 1     | 2      | 14          | 36.47 | -0.91 | 7.62 | -1.38 | Yes |
| 0-3      | 213.26 | 2     | 1     | 2      | 16          | 36.47 | -0.91 | 7.58 | -1.58 | Yes |
| 0-4      | 192.21 | 3     | 2     | 3      | 14          | 61.70 | 2.26  | 4.45 | 3.44  | Yes |
| 0-5      | 194.19 | 4     | 0     | 3      | 14          | 65.60 | -2.50 | 9.21 | -3.80 | No  |
| 0-6      | 152.15 | 3     | 1     | 1      | 11          | 59.53 | -2.83 | 9.65 | -3.33 | No  |
| 0-7      | 150.18 | 2     | 2     | 1      | 11          | 58.61 | 1.88  | 4.94 | 2.21  | Yes |
| 0-8      | 180.23 | 2     | 1     | 2      | 13          | 39.71 | 0.31  | 9.15 | -3.38 | No  |
| 0-9      | 166.18 | 3     | 0     | 2      | 12          | 48.53 | -2.56 | 9.34 | -3.30 | No  |
| 1-0      | 151.19 | 2     | 1     | 1      | 11          | 36.47 | -2.31 | 9.13 | -2.72 | Yes |
| 2-0      | 191.25 | 2     | 1     | 2      | 14          | 36.47 | -0.96 | 7.68 | -1.46 | Yes |
| 3-0      | 213.26 | 2     | 1     | 2      | 12          | 36.47 | -1.00 | 7.67 | -1.74 | Yes |
| 4-0      | 194.21 | 3     | 2     | 3      | 14          | 65.57 | -2.95 | 9.66 | -4.49 | No  |
| 5-0      | 194.19 | 4     | 0     | 3      | 24          | 65.60 | -2.85 | 9.56 | -4.34 | No  |
| 6-0      | 151.16 | 3     | 2     | 1      | 11          | 52.82 | 2.21  | 4.61 | 2.60  | Yes |
| 7-0      | 150.18 | 2     | 2     | 1      | 11          | 58.61 | 1.88  | 4.94 | 2.21  | Yes |
| 8-0      | 180.23 | 2     | 1     | 2      | 13          | 39.71 | -2.76 | 9.50 | -3.88 | No  |
| 9-0      | 166.18 | 3     | 0     | 2      | 12          | 48.53 | -2.91 | 9.69 | -3.75 | No  |
| 2-1      | 205.28 | 2     | 1     | 2      | 15          | 36.47 | -0.56 | 7.25 | -0.92 | Yes |
| 2-2      | 245.34 | 2     | 1     | 3      | 18          | 36.47 | 0.79  | 5.82 | 1.57  | Yes |
| 2-3      | 267.35 | 2     | 1     | 3      | 20          | 36.47 | 0.79  | 5.78 | 1.75  | Yes |
| 2-4      | 247.29 | 3     | 1     | 4      | 18          | 68.40 | -1.09 | 7.69 | -2.16 | Yes |
| 2-5      | 248.28 | 4     | 0     | 4      | 18          | 65.60 | -0.80 | 7.41 | -1.60 | yes |
| 2-6      | 206.24 | 3     | 1     | 2      | 15          | 59.53 | -1.14 | 7.82 | -1.86 | Yes |
| 2-8      | 234.32 | 2     | 1     | 3      | 17          | 39.71 | -0.71 | 7.34 | -1.33 | Yes |
| 2-9      | 220.27 | 3     | 0     | 3      | 16          | 48.53 | -0.86 | 7.52 | -1.51 | Yes |
| 3-1      | 227.28 | 2     | 1     | 2      | 17          | 36.47 | -0.56 | 7.21 | -1.05 | Yes |
| 3-2      | 267.35 | 2     | 1     | 3      | 20          | 36.47 | 0.75  | 5.82 | 1.67  | Yes |

| Compound | M.W.   | # HBA | # HBD | # R.B. | #heavy atom | PSA   | cLogP | LLE  | LELP  | BBB |
|----------|--------|-------|-------|--------|-------------|-------|-------|------|-------|-----|
| 3-3      | 289.35 | 2     | 1     | 3      | 22          | 36.47 | 0.75  | 5.79 | 1.85  | Yes |
| 3-4      | 269.3  | 3     | 1     | 4      | 20          | 68.40 | -1.13 | 7.70 | -2.50 | Yes |
| 3-5      | 270.28 | 4     | 0     | 4      | 20          | 65.60 | -0.84 | 7.41 | -1.87 | Yes |
| 3-6      | 228.25 | 3     | 1     | 2      | 17          | 59.53 | -1.17 | 7.82 | -2.19 | Yes |
| 3-8      | 256.32 | 2     | 1     | 3      | 19          | 39.71 | -0.75 | 7.34 | -1.57 | Yes |
| 3-9      | 242.27 | 3     | 0     | 3      | 18          | 48.53 | -0.90 | 7.51 | -1.78 | Yes |
| 4-1      | 206.24 | 3     | 2     | 3      | 15          | 61.69 | 2.61  | 4.08 | 4.26  | Yes |
| 4-2      | 246.30 | 3     | 2     | 4      | 18          | 61.69 | 3.96  | 2.65 | 7.86  | Yes |
| 4-3      | 268.31 | 3     | 2     | 4      | 20          | 61.69 | 3.92  | 2.65 | 8.70  | Yes |
| 4-4      | 249.27 | 4     | 3     | 5      | 18          | 90.79 | 1.97  | 4.64 | 3.91  | No  |
| 4-5      | 251.24 | 5     | 1     | 5      | 18          | 94.70 | -2.80 | 9.40 | -5.56 | No  |
| 4-6      | 209.20 | 4     | 2     | 3      | 15          | 88.63 | -3.13 | 9.81 | -5.12 | No  |
| 4-8      | 237.28 | 3     | 2     | 4      | 17          | 68.81 | -2.70 | 9.33 | -5.06 | No  |
| 4-9      | 222.24 | 4     | 2     | 4      | 16          | 70.92 | 2.19  | 4.46 | 3.84  | Yes |
| 5-1      | 208.21 | 4     | 0     | 3      | 15          | 65.60 | -2.46 | 9.14 | -4.02 | No  |
| 5-2      | 248.28 | 4     | 0     | 4      | 18          | 65.60 | -1.10 | 7.71 | -2.19 | Yes |
| 5-3      | 270.28 | 4     | 0     | 4      | 20          | 65.60 | -1.10 | 7.67 | -2.45 | Yes |
| 5-4      | 251.24 | 5     | 1     | 5      | 18          | 94.70 | -2.80 | 9.40 | -5.56 | No  |
| 5-5      | 252.22 | 6     | 0     | 5      | 18          | 91.90 | -2.51 | 9.11 | -5.00 | No  |
| 5-6      | 210.19 | 5     | 1     | 3      | 15          | 85.83 | -2.85 | 9.52 | -4.66 | No  |
| 5-8      | 238.26 | 4     | 1     | 4      | 17          | 66.01 | -2.42 | 9.04 | -4.53 | No  |
| 5-9      | 224.21 | 5     | 0     | 4      | 16          | 74.83 | -2.57 | 9.22 | -4.51 | No  |
| 9-1      | 180.20 | 3     | 0     | 2      | 13          | 48.53 | -2.51 | 9.26 | -3.53 | Yes |
| 9-2      | 219.28 | 3     | 1     | 3      | 16          | 41.82 | 4.19  | 2.47 | 7.33  | Yes |
| 9-3      | 241.29 | 3     | 1     | 1      | 18          | 41.82 | 4.15  | 2.47 | 8.22  | Yes |
| 9-4      | 223.23 | 4     | 1     | 4      | 16          | 77.63 | -2.85 | 9.51 | -5.01 | No  |
| 9-5      | 224.21 | 5     | 0     | 4      | 16          | 74.83 | -2.57 | 9.22 | -4.51 | No  |
| 9-6      | 182.18 | 4     | 1     | 2      | 13          | 68.76 | -2.90 | 9.64 | -4.08 | No  |
| 9-8      | 210.25 | 3     | 1     | 3      | 15          | 48.94 | -2.48 | 9.16 | -4.06 | No  |
| 9-9      | 196.20 | 4     | 0     | 3      | 14          | 57.76 | -2.63 | 9.34 | -4.00 | No  |

**Table S3** PCM-ONIOM2 binding energy (B.E., kcal/mol) at B3LYP/6-31G\*:PM7 and MP2/6-31G\*:PM7 levels of theory for 2-PAM and screened analogs

| Compound | B3LYP/6-31G*:PM7 | MP2/6-31G*:PM7 |
|----------|------------------|----------------|
| 0-1      | -206.04          | -186.97        |
| 0-2      | -150.49          | -172.80        |
| 0-3      | -179.55          | -204.21        |
| 2-0      | -157.09          | -194.47        |
| 3-0      | -163.42          | -187.86        |
| 2-3      | -183.39          | -216.85        |
| 2-4      | -170.08          | -199.45        |
| 2-5      | -149.63          | -179.49        |
| 2-6      | -150.65          | -174.44        |
| 3-1      | -205.40          | -228.63        |
| 3-2      | -157.46          | -204.58        |
| 3-4      | -178.30          | -209.81        |
| 3-5      | -184.42          | -214.09        |
| 3-6      | -168.30          | -192.09        |
| 3-9      | -170.37          | -201.07        |
| 5-2      | -147.54          | -173.27        |
| 5-3      | -173.37          | -204.36        |
| 9-1      | -199.22          | -182.65        |
| 2-PAM    | -172.63          | -185.20        |

**Table S4** The pair interaction energy (PIE) of the focused compounds (2-PAM and 3-1) with key interacting residues calculated by the FMO-RIMP2/6-31G\*/PCM. The difference in individual interactions between 2-PAM and 3-1 ( $\Delta$ PIE) is also given.

| Key interacting residue | FMO-RIMP2/6-31G*/PCM (kcal/mol) |         |              |
|-------------------------|---------------------------------|---------|--------------|
|                         | 2-PAM                           | 3-1     |              |
|                         | PIE                             | PIE     | $\Delta$ PIE |
| D74                     | -56.16                          | -53.13  | 3.03         |
| T83                     | -1.70                           | -1.55   | 0.15         |
| W86                     | -11.71                          | -2.39   | 9.32         |
| G121                    | -0.12                           | -0.93   | -0.81        |
| Y124                    | -3.38                           | -4.62   | -1.23        |
| S203-Paraoxon           | -7.67                           | -33.09  | -25.42       |
| W286                    | -2.23                           | -3.93   | -1.70        |
| F295                    | -0.63                           | -0.63   | 0.01         |
| R296                    | 10.73                           | 14.13   | 3.40         |
| F297                    | -10.32                          | -19.17  | -8.85        |
| Y337                    | 11.75                           | 12.03   | 0.27         |
| W338                    | -5.07                           | -5.75   | -0.68        |
| Y341                    | -1.19                           | -4.87   | -3.68        |
| PIE <sup>Total</sup>    | -77.68                          | -103.88 | -26.20       |

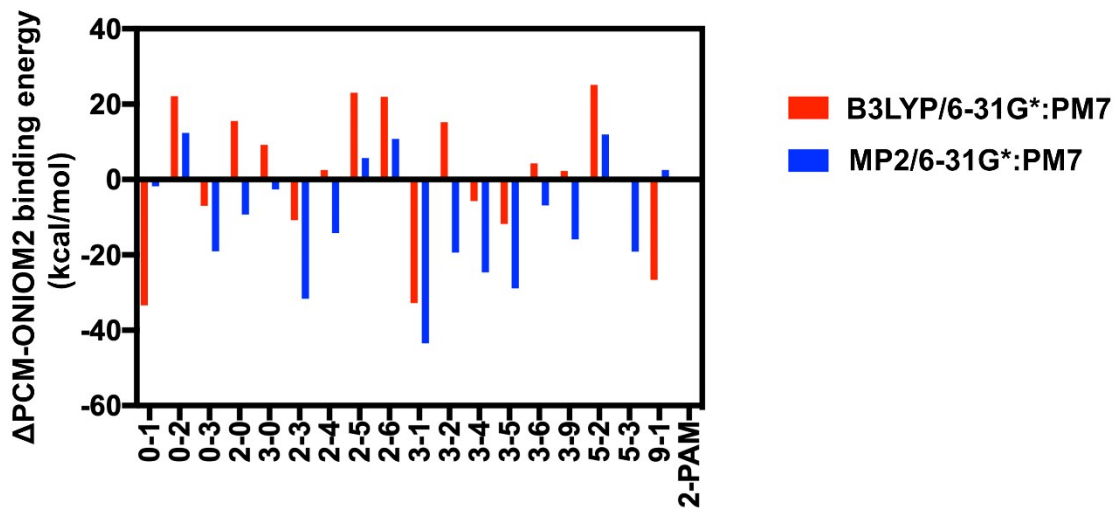

**Figure S2**  $\Delta$ PCM-ONIOM2 binding energy (B.E., kcal/mol) at B3LYP/6-31G\*:PM7 and MP2/6-31G\*:PM7 levels of theory for 18 screened analogs in complex with paraoxon-AChE relative to 2-PAM

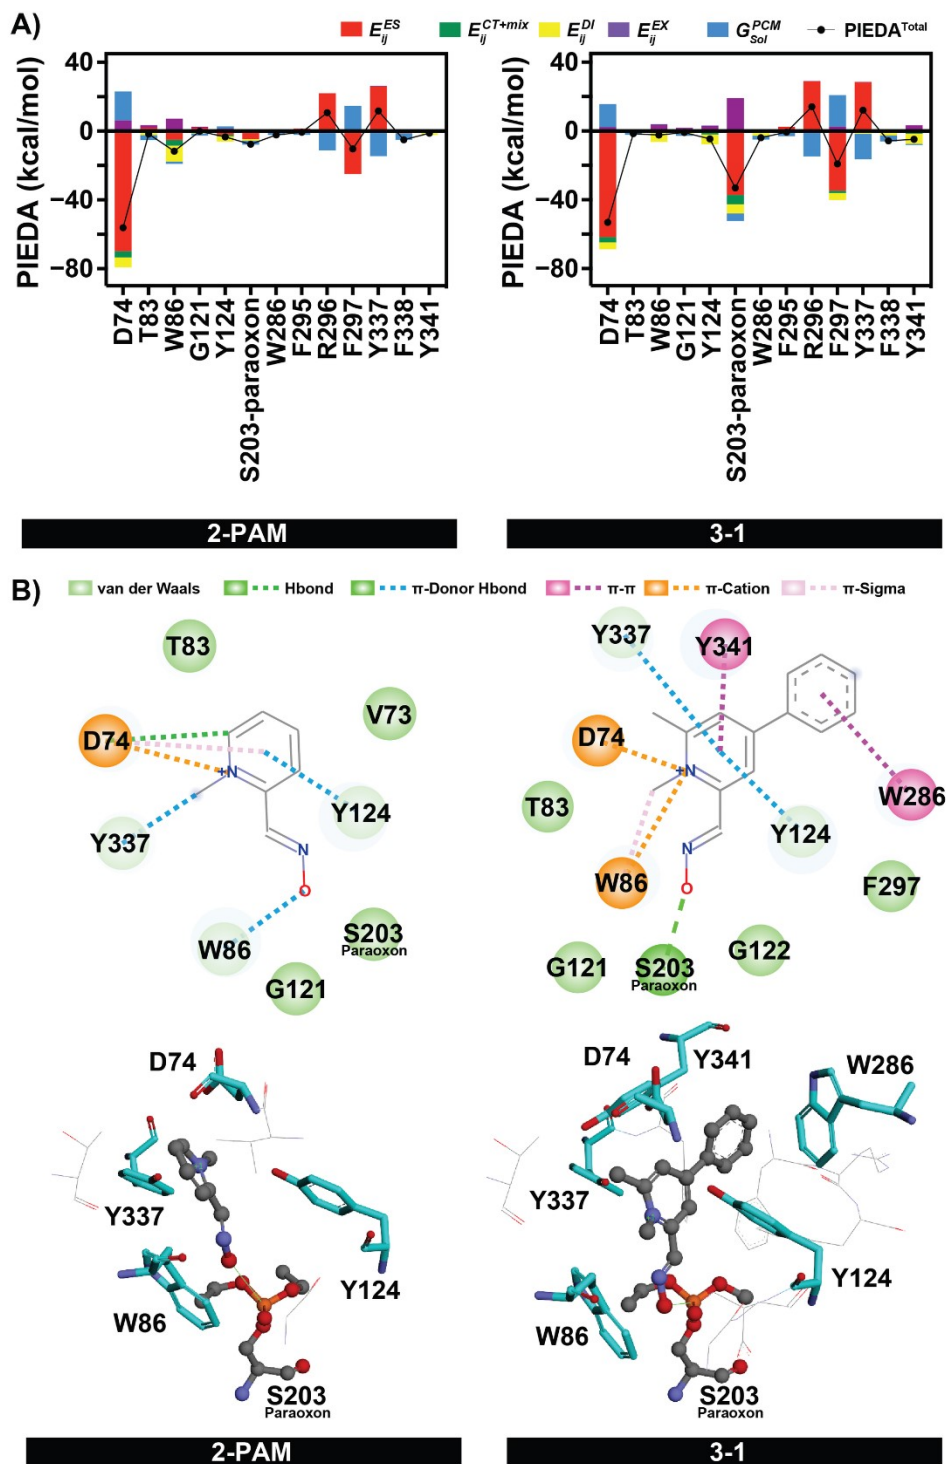

**Figure S3** FMO-RIMP2/6-31G\*/PCM interaction energy comparison of 2-PAM and 3-1 analog binding at the paraoxon-AChE active site. (A) Energy decomposition analysis (PIEDA) and total interaction energy ( $PIE^{Total}$ ) are presented as a stacked bar graph and line plot. (B) Ligand-binding interaction in 2D and 3D perspectives are visualized using Accelrys Discovery Studio
